# Supplementary material
Source: HighWire-hosted journal article supplement (https://jitc.bmj.com/content/11/3/e006292)

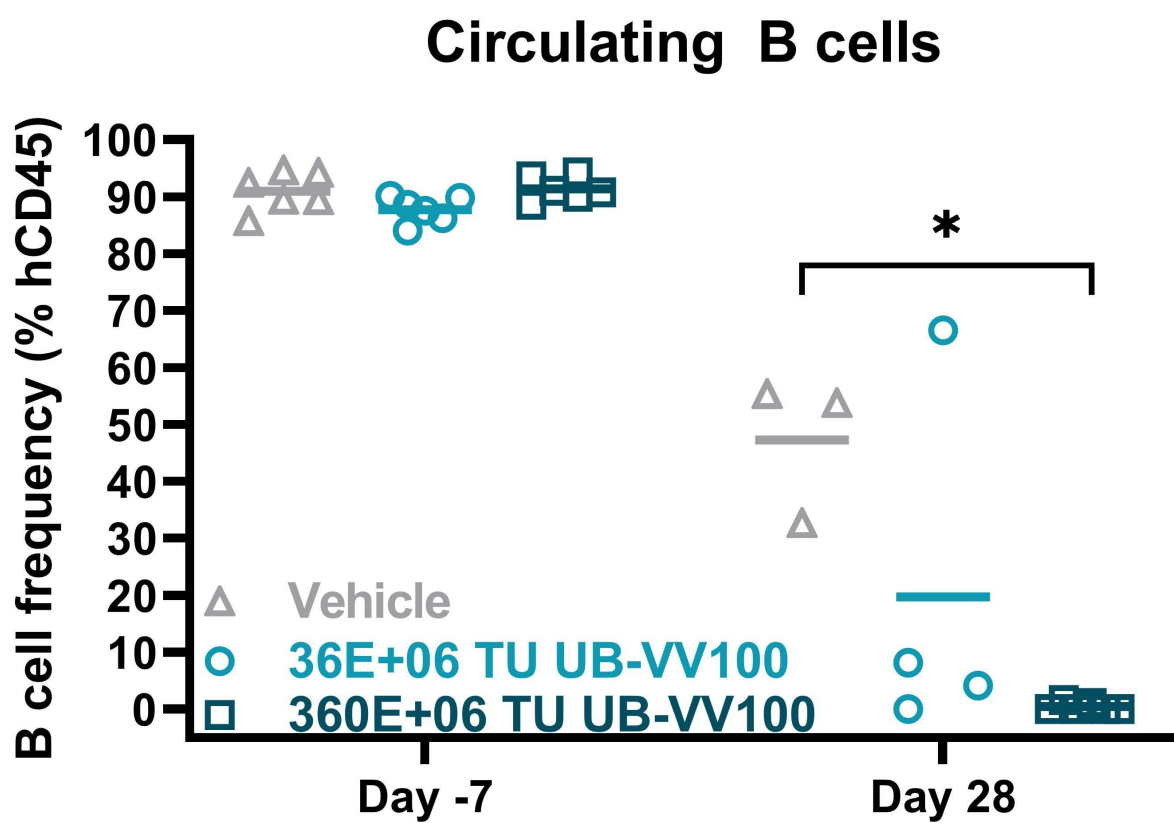

Supplement: inline-supplementary-material-4 [file inline-supplementary-material-4.pdf]

### A) Bone marrow Vehicle Day 26

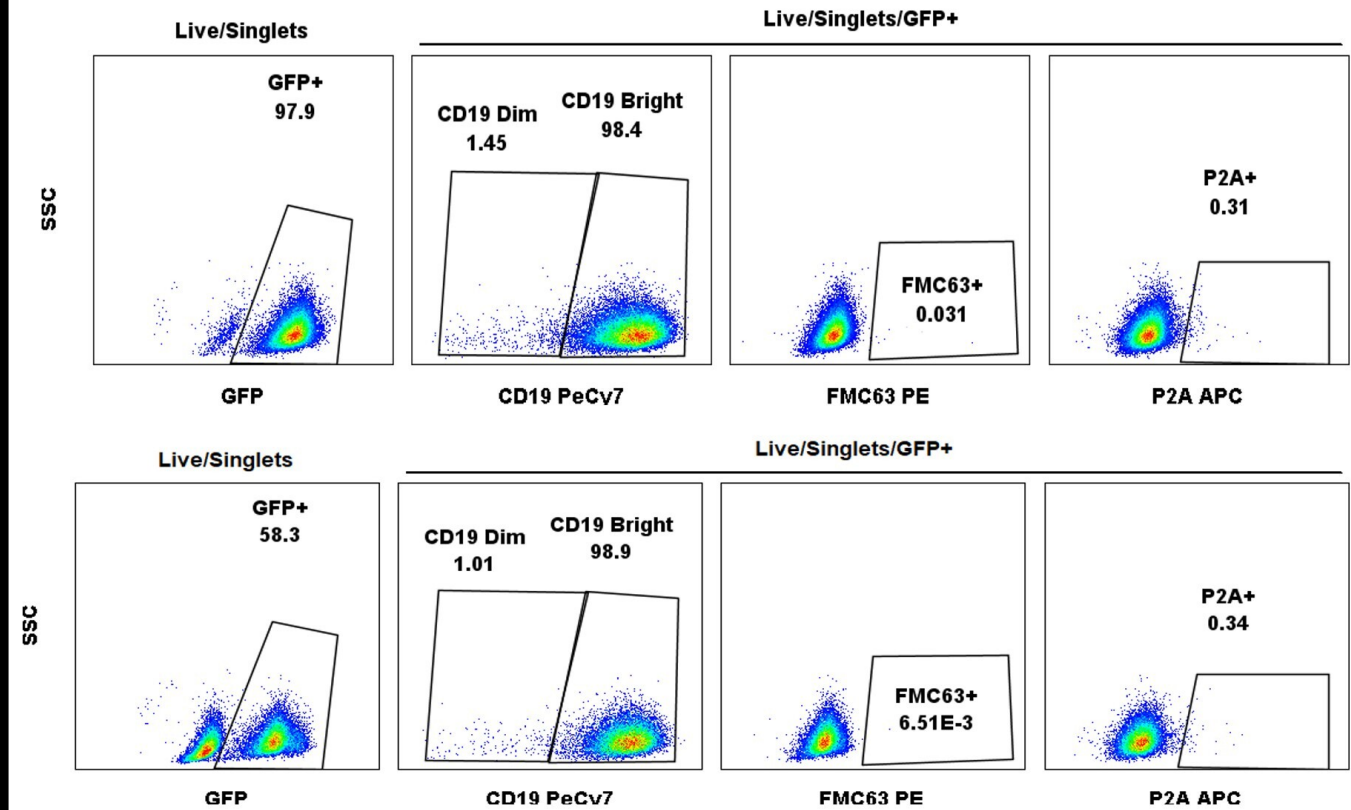

### B) Bone marrow 100E+06 TU UB-VV100 Day 42

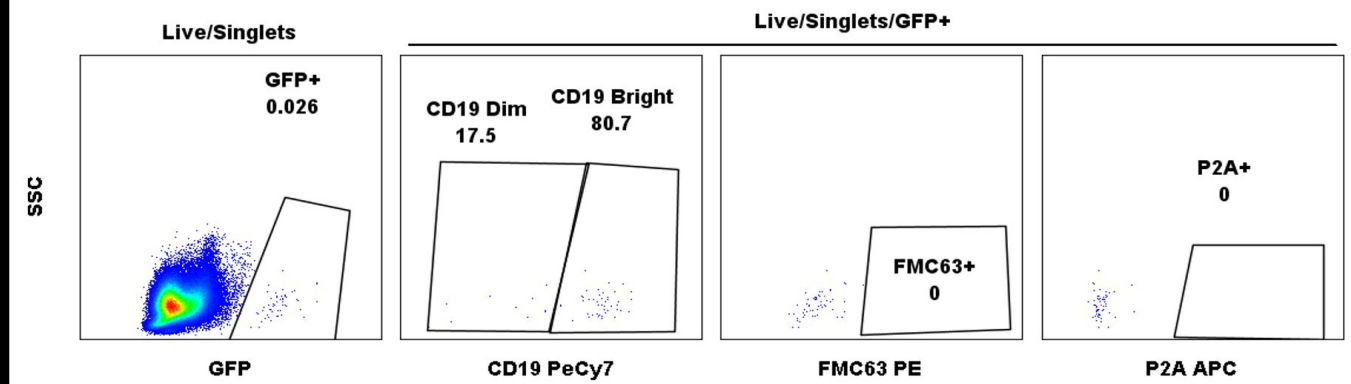

### C) Bone marrow 100E+06 TU UB-VV100 Day 85

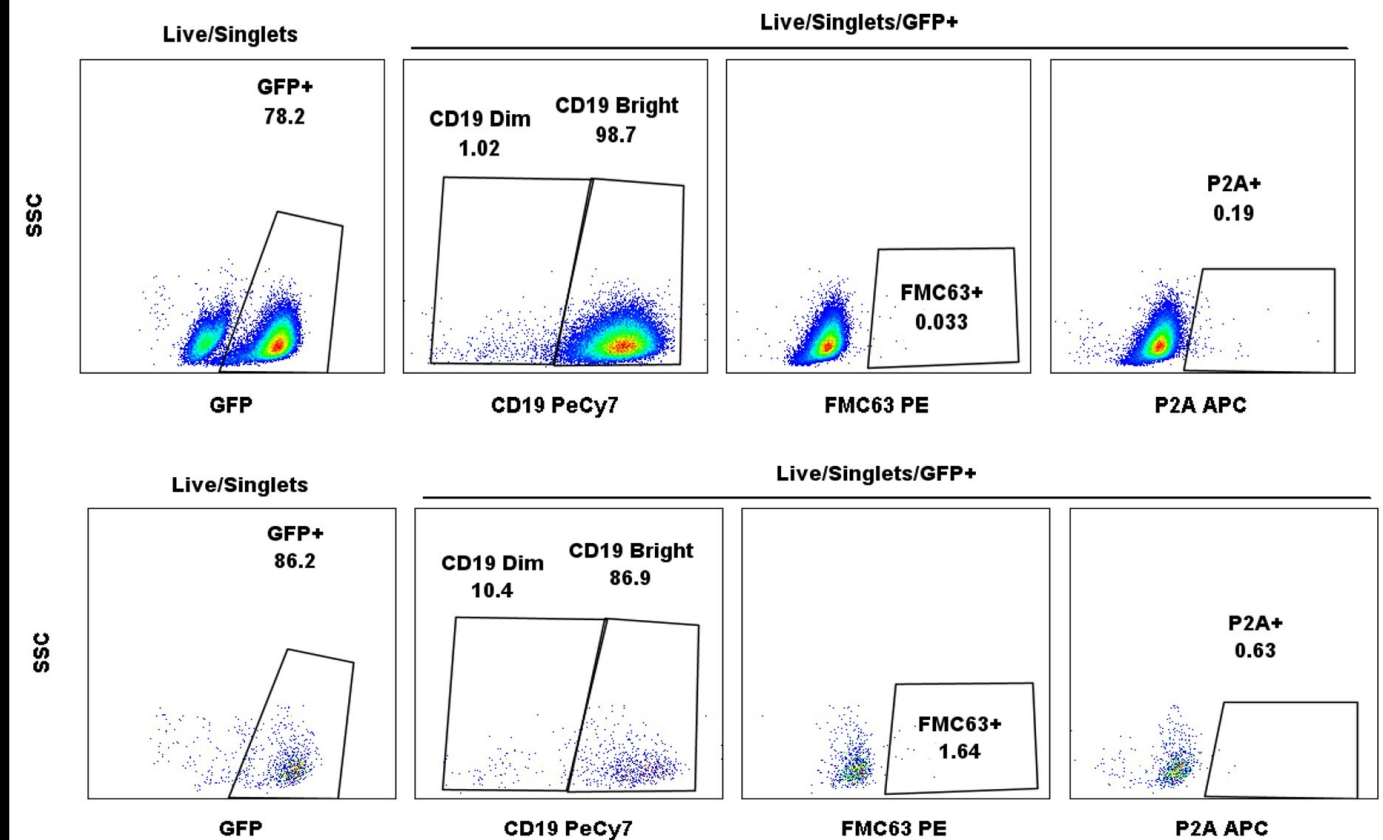

Supplement: inline-supplementary-material-6 [file inline-supplementary-material-6.pdf]

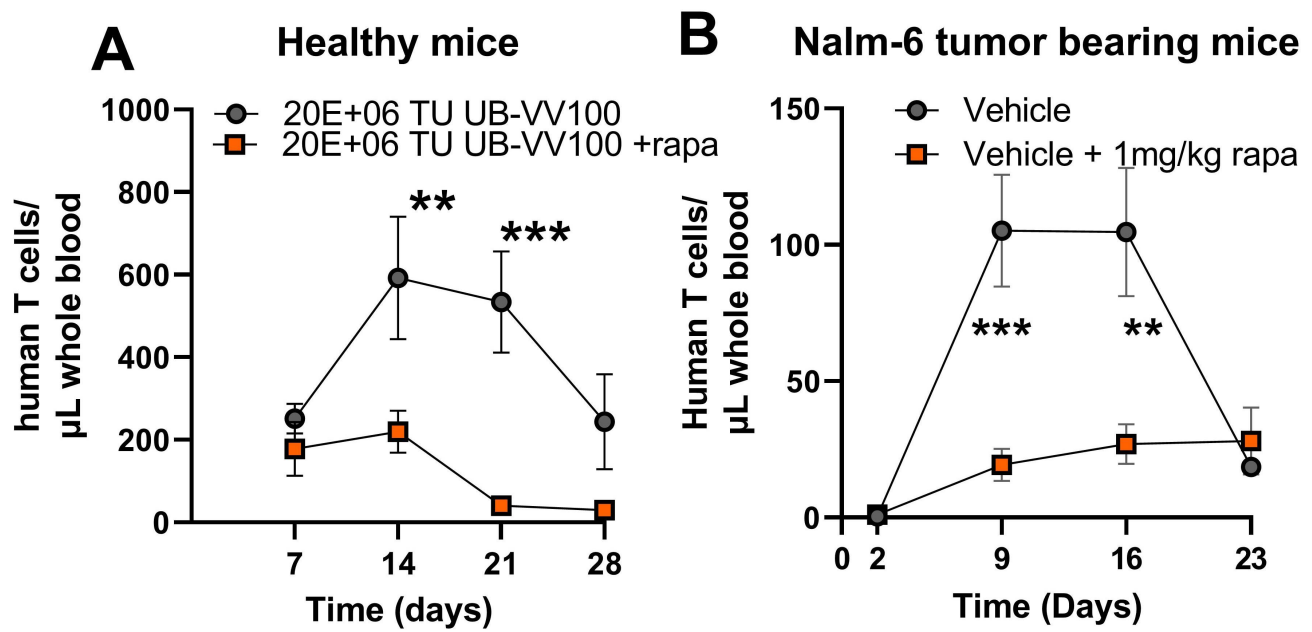

Supplement: inline-supplementary-material-7 [file inline-supplementary-material-7.pdf]

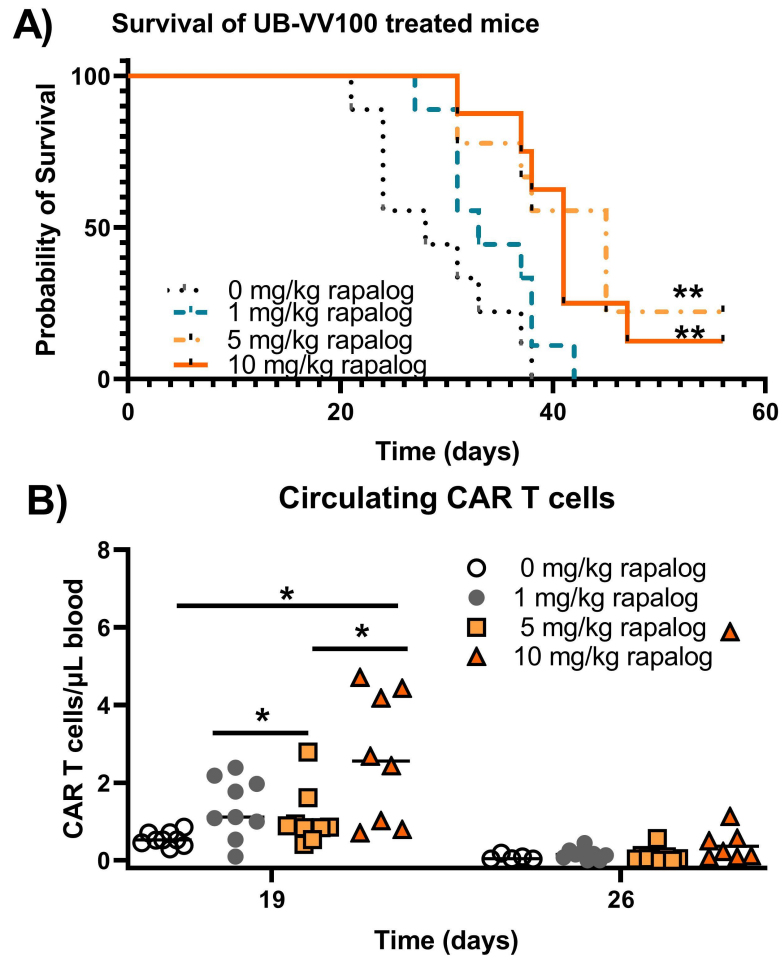

Supplement: inline-supplementary-material-9 [file inline-supplementary-material-9.pdf]
